# Supplementary material for: Thermoresponsive nanogels with film-forming ability
Source: Royal Society of Chemistry journal article supplement (doi:10.1039/c7py01798g), 2018-01-01
Supplement: c7py01798g1.pdf [file c7py01798g1.pdf]

## Supplementary Information

### Thermoresponsive nanogels with film-forming ability

Ana S. Sonzogni,<sup>1</sup> Mario C.G. Passeggi (Jr.),<sup>2,3</sup> Stefanie Wedepohl,<sup>4</sup>  
Marcelo Calderón,<sup>4</sup> Luis M. Gugliotta,<sup>1,3</sup> Verónica D.G. Gonzalez,<sup>1,5</sup> Roque J. Minari<sup>1,3</sup>

- (1) Group of Polymers and Polymerization Reactors, INTEC (Universidad Nacional del Litoral-CONICET), Güemes 3450, Santa Fe 3000, Argentina
- (2) Physics of Surfaces and Interfaces Laboratory, IFIS Litoral (Universidad Nacional del Litoral-CONICET), Güemes 3450, Santa Fe 3000, Argentina
- (3) Chemical Engineering Faculty (Universidad Nacional del Litoral), Santiago del Estero 2829, Santa Fe 3000, Argentina
- (4) Institute of Chemistry and Biochemistry, Freie Universität Berlin, Takustrasse 3, 14195 Berlin, Germany
- (5) Biochemistry and Biological Science Faculty (Universidad Nacional del Litoral), Ciudad Universitaria, Santa Fe 3000, Argentina

#### **Determination of Minimum film formation temperature (MFFT)**

Determination of MFFT was based on an optical method reported elsewhere<sup>1</sup>. It involved the observation of the clarity of a cast film on a large metal table with a temperature gradient (see illustration of Figure S.1.a). The minimum temperature on it, where the film was judged to be clear, was considered the MFFT value. For this purpose, in this work a homemade equipment (Figure S.1.b) was employed. It consisted of a stainless steel table which could be controlled heated on one extreme and cooled on the other. Temperature gradient was measured by mean of 16 thermoresistances mounted at regular distance under the surface of the platen. A

quadrangular applicator (Neurtek Instruments) was used to apply the film with 120  $\mu$ m thickness (Figure S.1.b). Figure S.1.c shows a photo of MFFT determination of the dispersions S3 and S4, where it could be observed that they were able to form film in the whole temperature range applied onto the table (7-25  $^{\circ}$ C).

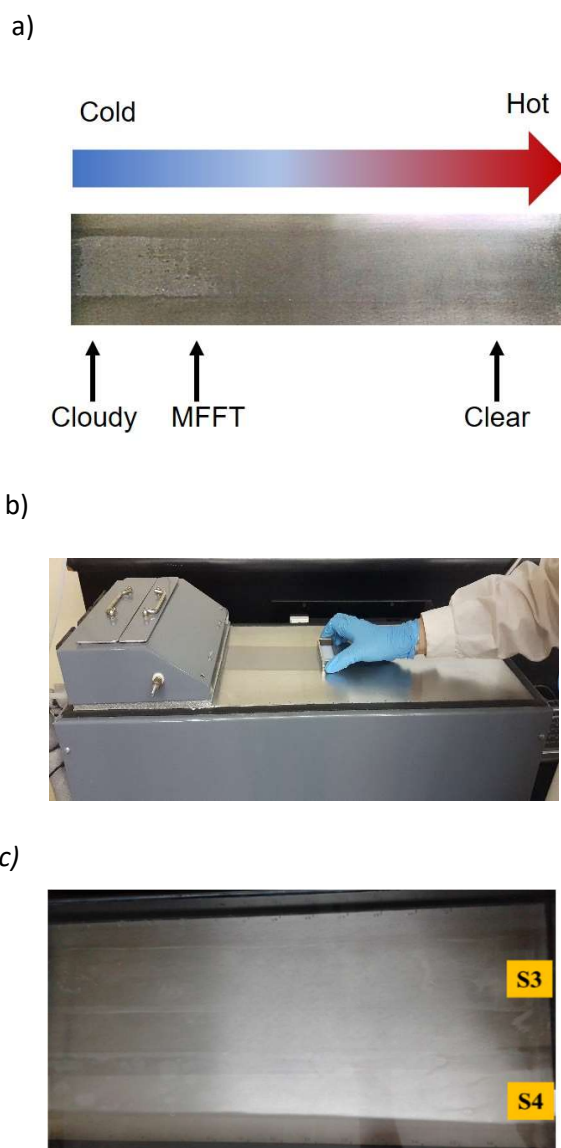

**Figure S.1** – MFFT determination. MFFT observation in a cast film on the metal table (a); employed equipment (b), and MFFT determination on the cast S3 and S4 films (c).

## Instantaneous VCL conversion

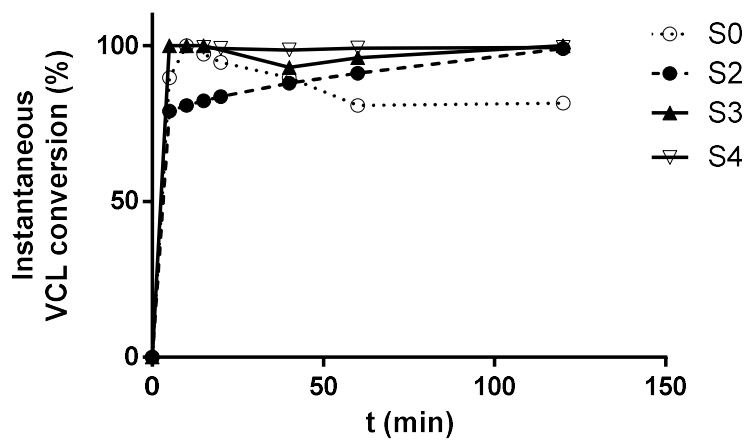

**Figure S.2** – Instantaneous VCL conversion along the semibatch polymerizations S0, S2, S3 and S4.

## References

1. J. L. Keddie, *Mater. Sci. Eng. R Reports*, 1997, **21**, 101–170.
